# Supplementary material for: Ultrafast time-resolved carrier dynamics in tellurium nanowires using optical pump terahertz probe spectroscopy
Source: Royal Society of Chemistry journal article supplement (doi:10.1039/d3nr01588b), 2023-01-01
Supplement: d3nr01588b1.pdf [file d3nr01588b1.pdf]

# Ultrafast Time Resolved Carrier Dynamics in Tellurium Nanowires using Optical Pump Terahertz Probe Spectroscopy

K P Mithun<sup>1,2</sup>, Shalini Tripathi<sup>3</sup>, Ahin Roy<sup>3,4</sup>, N Ravishankar<sup>3</sup> and A K Sood<sup>1,2\*</sup>

<sup>1</sup>*Center for Ultrafast Laser Applications,*

*Indian Institute of Science, Bangalore 560012, India*

<sup>2</sup>*Department of Physics, Indian Institute of Science, Bangalore 560012, India*

<sup>3</sup>*Materials Research Center, Indian Institute of Science, Bangalore 560012, India*

<sup>4</sup>*Materials Science Center, Indian Institute of Technology, Kharagpur, IN 721302, India*

## SUPPLEMENTARY INFORMATION

### S1. Time resolved dynamics of $\Delta\sigma(\tau_{pp})$ using the bi - exponential function

In this section we show the time resolved dynamics of  $\Delta\sigma(\tau_{pp})$  along with the fit obtained using the bi - exponential function

$$\Delta\sigma(\tau_{pp}) = \sum_{i=f,s} A_i \exp(-\tau_{pp}/\tau_i) \quad (S1)$$

where,  $A_i$  is the amplitude and  $\tau_i$  corresponds to the fast( $\tau_f$ ) and slow( $\tau_s$ ) decay time constants.

#### S1.1 Capping dependent dynamics

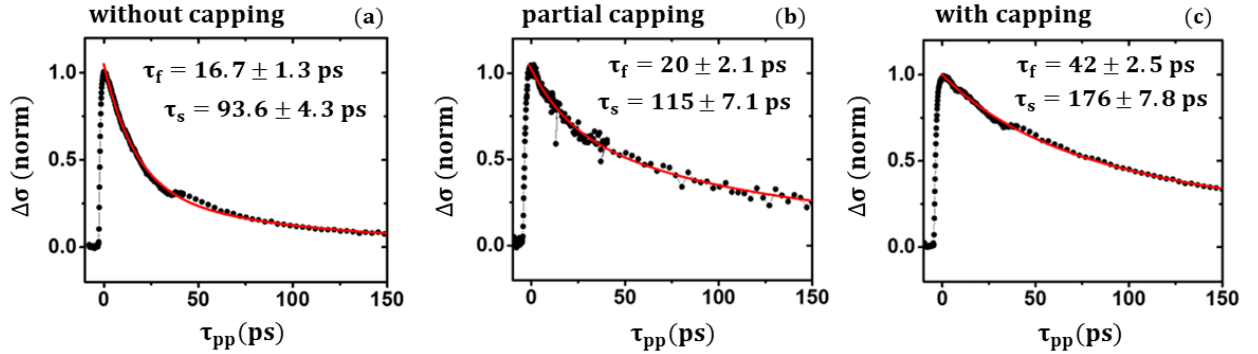

FIG. S1. Normalized dynamics of  $\Delta\sigma(\tau_{pp})$  at different capping concentrations (a) without capping, (b) partial capping and (c) with capping at  $T_L = 300$  K and  $\varphi = 276 \mu\text{J}/\text{cm}^2$ . The red solid lines corresponds to the fit obtained using the bi - exponential function along with the timescales presented in the inset

Fig. S2 represents the dynamics of  $n_s$  extracted from the rate equation model. The red solid line corresponds to the fit obtained using the function;

$$n_s(\tau_{pp}) = \sum_{i=f,s} S_i (1 - \exp(-\tau_{pp}/\tau_{ns(i)})) \quad (S2)$$

The fast time constant ( $\tau_f$ ) governs the dynamics of  $n_s$  (Eq. 3), which represents the filling up of the surface state density by the photoexcited carriers. In the supplementary information (SI), we show that the fast time constant associated with the dynamics of  $n_s$  ( $\tau_{ns(f)}$ ) closely

matches the value of  $\tau_f$  (shown in Fig. S2). Since, the dynamics of  $n_s$  is coupled with the dynamics of charge carriers that relax via. direct electron hole recombination mechanism, direct connection of  $\tau_{ns(s)}$  with  $\tau_s$  is not straightforward. However, the slow time constant ( $\tau_s$ ) estimated from the bi - exponential fitting is attributed to the direct electron - hole recombination process where  $\tau_s$  closely matches with  $\tau_R = 1/(\delta n D_R) \sim 100$  ps as evaluated from the rate equation model

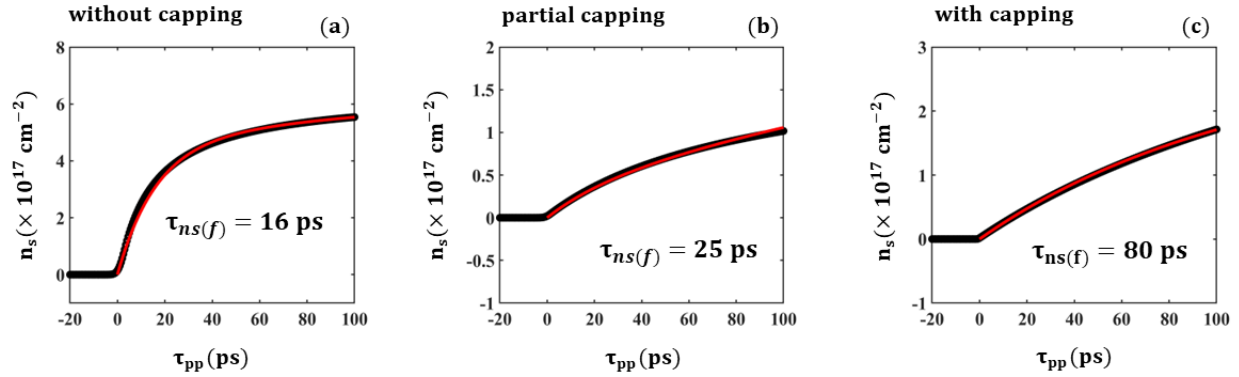

FIG. S2. The time evolution of  $n_s$  (black solid circles) extracted using the rate equation model for (a) without capping. (b) partial capping and (c) with capping. The red solid line corresponds to the fit obtained using Eq. S2

### S1.2 Temperature dependent dynamics

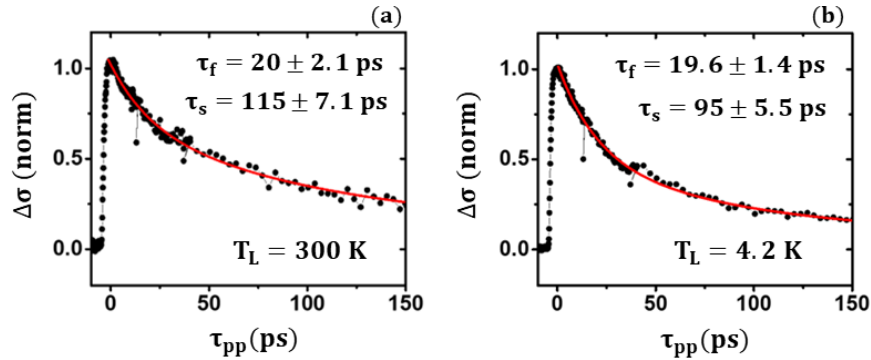

FIG. S3. (a) and (b) shows the  $T_L$  dependent dynamics of  $\Delta\sigma(\tau_{pp})$  of partially capped TeNWs sample at  $T_L = 300$  K and  $T_L = 4.2$  K, respectively with  $\varphi = 276 \mu\text{J}/\text{cm}^2$ . The red solid lines corresponds to the fit obtained using the bi - exponential function along with the timescales presented in the inset

### S1.3 Fluence dependent dynamics

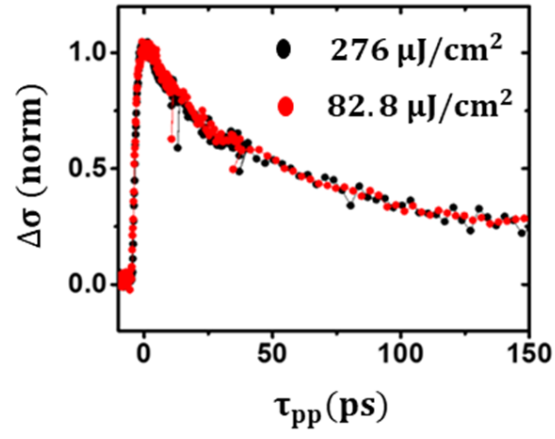

FIG. S4. Represents the dynamics of  $\Delta\sigma(\tau_{pp})$  with two pump fluences of  $\varphi = 276 \mu\text{J}/\text{cm}^2$  (black) and  $\varphi = 82.8 \mu\text{J}/\text{cm}^2$  (red) at  $T_L = 300$  K.
